# Supplementary material
Source: publisher site journal article supplement (https://www.dovepress.com/article/329208)
Supplement: Supplementary file 1 [file get_supplementary_file.php]

A

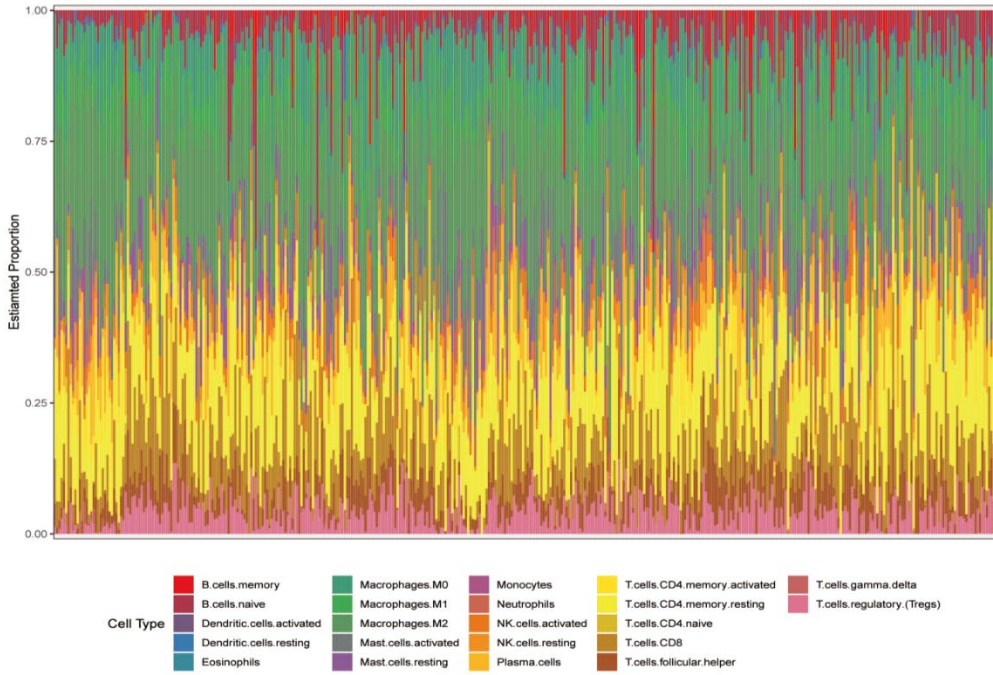

B

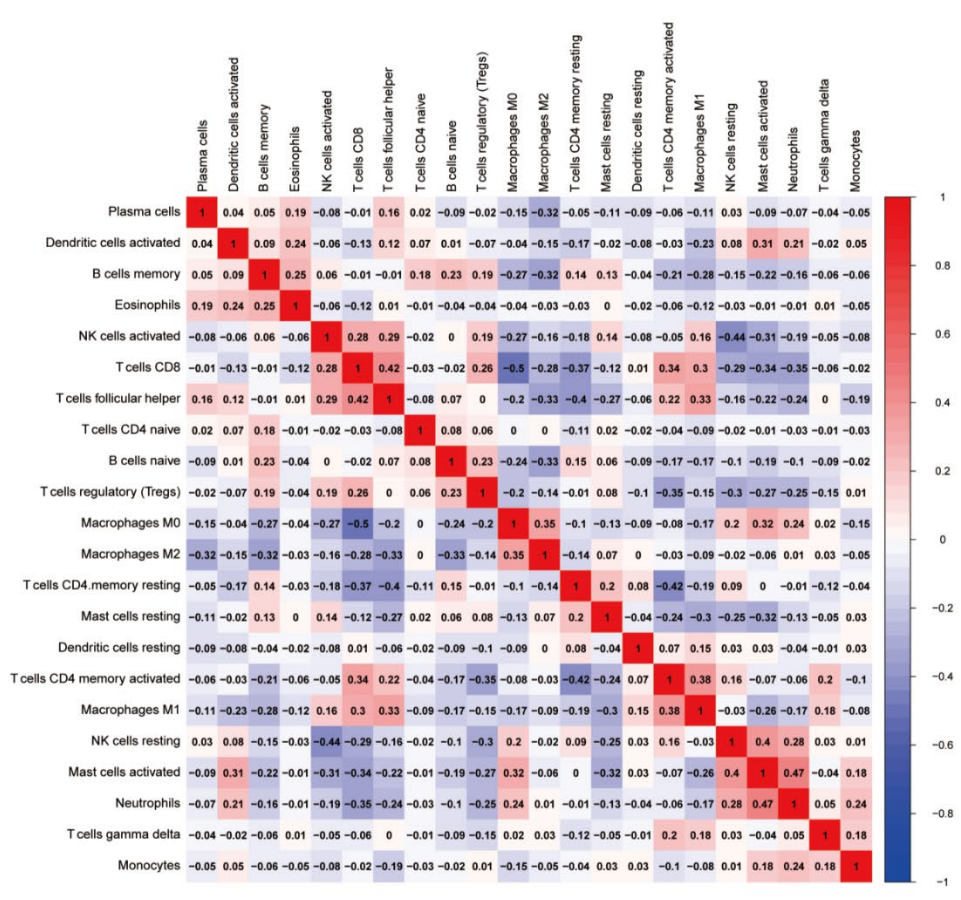

**A****M1 Macrophage**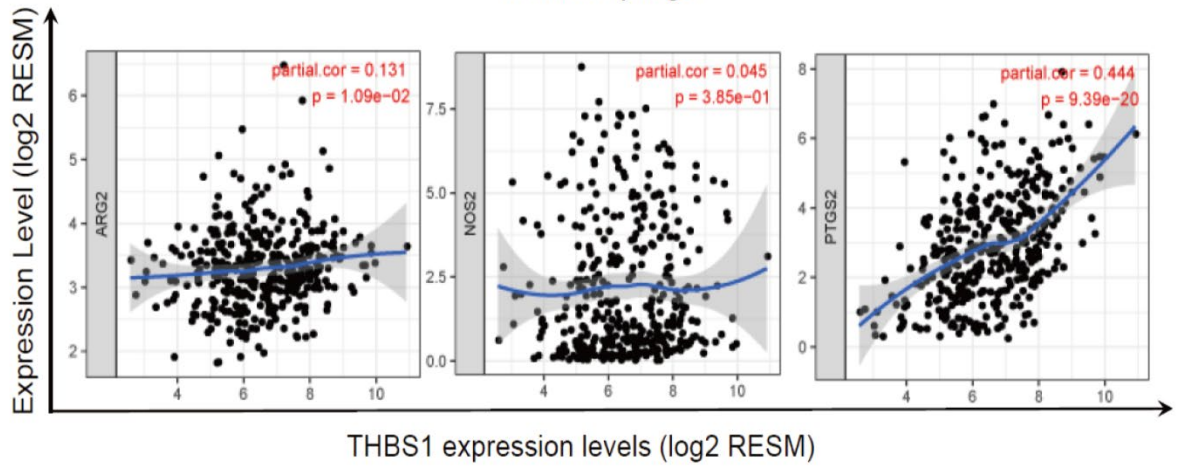**B****M2 Macrophage**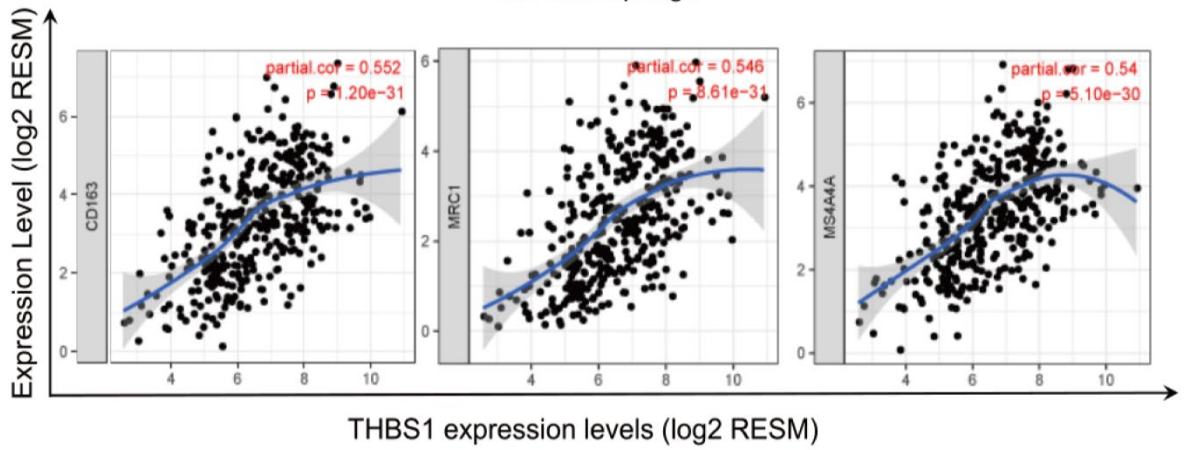**C****TAM**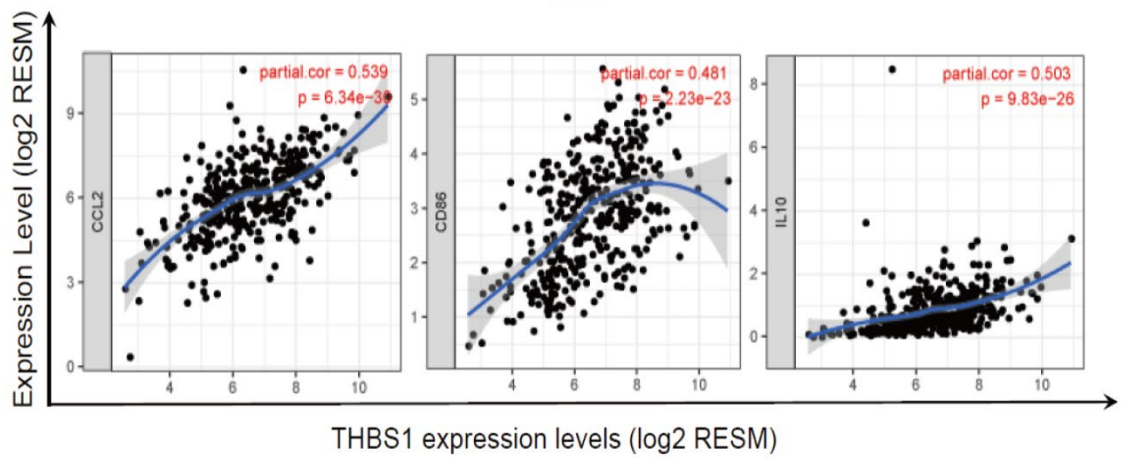

Supplementary Table S1

| Gene  | Drug                      | correlation | pvalue   |
|-------|---------------------------|-------------|----------|
| THBS1 | Oxaliplatin               | -0.5377     | 9.41E-06 |
| THBS1 | Tamoxifen                 | -0.50324    | 4.16E-05 |
| THBS1 | By-Product of CUDC-305    | -0.49616    | 5.54E-05 |
| THBS1 | Everolimus                | 0.472319    | 0.000139 |
| THBS1 | Ixabepilone               | -0.47176    | 0.000142 |
| THBS1 | Staurosporine             | 0.470288    | 0.00015  |
| THBS1 | Crizotinib                | -0.42445    | 0.000725 |
| THBS1 | PX-316                    | -0.40395    | 0.001371 |
| THBS1 | Nilotinib                 | -0.39947    | 0.001567 |
| THBS1 | Erlotinib                 | 0.395069    | 0.001784 |
| THBS1 | Palbociclib               | -0.38756    | 0.002218 |
| THBS1 | Methotrexate              | -0.38677    | 0.002268 |
| THBS1 | Homoharringtonine         | -0.3842     | 0.002441 |
| THBS1 | Dolastatin 10             | -0.37832    | 0.002879 |
| THBS1 | LDK-378                   | -0.37478    | 0.003175 |
| THBS1 | Vinblastine               | -0.37288    | 0.003344 |
| THBS1 | Vinorelbine               | -0.37168    | 0.003456 |
| THBS1 | Tanespimycin              | -0.36771    | 0.003848 |
| THBS1 | Rapamycin                 | 0.364174    | 0.00423  |
| THBS1 | Cyclophosphamide          | -0.36277    | 0.00439  |
| THBS1 | Dromostanolone Propionate | -0.35961    | 0.004772 |
| THBS1 | Eribulin mesilate         | -0.35815    | 0.004959 |
| THBS1 | Actinomycin D             | -0.356      | 0.005244 |
| THBS1 | Dasatinib                 | 0.346451    | 0.006694 |
| THBS1 | Bafetinib                 | -0.34602    | 0.006768 |
| THBS1 | Lenvatinib                | 0.338122    | 0.008234 |
| THBS1 | Imatinib                  | -0.3339     | 0.009127 |
| THBS1 | Acrichine                 | -0.32473    | 0.011358 |
| THBS1 | Raloxifene                | -0.31977    | 0.012753 |
| THBS1 | Paclitaxel                | -0.31877    | 0.013051 |
| THBS1 | Hypothemycin              | -0.31839    | 0.013165 |
| THBS1 | Zoledronate               | 0.318022    | 0.013278 |
| THBS1 | Entinostat                | -0.3126     | 0.015026 |
| THBS1 | Alvespimycin              | -0.3121     | 0.015197 |
| THBS1 | Triciribine phosphate     | 0.311724    | 0.015327 |
| THBS1 | Belinostat                | -0.31024    | 0.015849 |
| THBS1 | Dexrazoxane               | -0.30986    | 0.015982 |
| THBS1 | geldanamycin analog       | -0.3089     | 0.01633  |
| THBS1 | Simvastatin               | 0.303966    | 0.018219 |
| THBS1 | Bleomycin                 | 0.3013      | 0.019314 |

|       |                                                   |          |          |
|-------|---------------------------------------------------|----------|----------|
| THBS1 | Ibrutinib                                         | 0.299991 | 0.019872 |
| THBS1 | Lapachone                                         | -0.29885 | 0.020368 |
| THBS1 | 8-Chloro-adenosine                                | -0.29309 | 0.023044 |
| THBS1 | Pipamperone                                       | -0.29188 | 0.023645 |
| THBS1 | Cobimetinib (isomer 1)                            | -0.28558 | 0.02698  |
| THBS1 | Irofulven                                         | 0.285566 | 0.026985 |
| THBS1 | BN-2629                                           | -0.28511 | 0.027243 |
| THBS1 | Dimethylaminoparthenolide                         | -0.28198 | 0.029053 |
| THBS1 | Lomustine                                         | -0.28165 | 0.02925  |
| THBS1 | Vincristine                                       | -0.28118 | 0.029531 |
| THBS1 | Fluorouracil                                      | -0.27758 | 0.031773 |
| THBS1 | AT-13387                                          | -0.2772  | 0.032017 |
| THBS1 | XK-469                                            | -0.27188 | 0.035601 |
| THBS1 | Sunitinib                                         | -0.26474 | 0.040939 |
| THBS1 | E-7820                                            | -0.26292 | 0.042399 |
| THBS1 | 7-Tert-butyltrimethylsilyl-10-hydroxycamptothecin | -0.26213 | 0.043044 |
| THBS1 | Ifosfamide                                        | -0.2575  | 0.047004 |
| THBS1 | Amonafide                                         | -0.25722 | 0.047252 |
| THBS1 | Afatinib                                          | 0.257109 | 0.047352 |
| THBS1 | O-6-Benzylguanine                                 | 0.256173 | 0.048192 |
| THBS1 | Daunorubicin                                      | -0.25587 | 0.048469 |

### Supplementary Figure Legends

Figure S1 Analysis of the proportion of tumor infiltrating immune cells in GC and their correlation with CIBERSORT. **(A)** Estimated proportion of 22 tumor infiltrating immune cells in GC. **(B)** Correlation of 22 tumor infiltrating immune cells.

Figure S2 Correlation of *THBS1* expression with markers of macrophage polarization in GC. Scatter plots of the correlation of *THBS1* expression with M1 macrophages **(A)**, M2 macrophages **(B)** and TAMS (tumor-associated macrophages) **(C)** are shown.

### Supplementary Table

Table S1 Correlation of *THBS1* with anticancer drug sensitivity
